# Supplementary material for: The Shared Proteome of the Apomictic Fern Dryopteris affinis ssp. affinis and Its Sexual Relative Dryopteris oreades
Source: MDPI journal article supplement (doi:10.3390/ijms232214027), 2022-11-14
Supplement: s1 [file s1]

Table S2. Functional STRING interactions of proteins extracted from gametophytes of *Dryopteris affinis* and *D. oreades*, which were grouped as growth and reproduction, phytohormones, gene expression, and abiotic response.

| Node1                      | Node2     | Neighborhood | Co-occurrence | Homology | Co-expression | Experiments | Database | Textmining | Score |
|----------------------------|-----------|--------------|---------------|----------|---------------|-------------|----------|------------|-------|
| <i>Growth-Reproduction</i> |           |              |               |          |               |             |          |            |       |
| ENO1                       | GAPCP-1   | 0.184        | 0             | 0        | 0.869         | 0.678       | 0        | 0.544      | 0.982 |
| ENO1                       | GAPCP-2   | 0.184        | 0             | 0        | 0.805         | 0.678       | 0        | 0.550      | 0.973 |
| ENO1                       | PGM2      | 0            | 0             | 0        | 0.901         | 0.217       | 0        | 0.625      | 0.968 |
| ENO1                       | PGMP      | 0            | 0             | 0        | 0.901         | 0.217       | 0        | 0.567      | 0.963 |
| PGM2                       | PGMP      | 0            | 0.449         | 0.954    | 0.085         | 0           | 0.800    | 0.645      | 0.818 |
| PUR4                       | SHM4      | 0.174        | 0             | 0        | 0.521         | 0           | 0        | 0.577      | 0.818 |
| ACT7                       | PRF5      | 0            | 0             | 0        | 0.045         | 0.512       | 0.390    | 0.373      | 0.798 |
| CPN60A                     | SHD       | 0            | 0             | 0        | 0.312         | 0.185       | 0        | 0.667      | 0.797 |
| EMB2761                    | OVA4      | 0.190        | 0             | 0        | 0.272         | 0           | 0        | 0.647      | 0.773 |
| ACT7                       | VLN2      | 0            | 0             | 0        | 0.046         | 0.184       | 0.612    | 0.330      | 0.770 |
| OVA4                       | OVA9      | 0.190        | 0             | 0        | 0.128         | 0           | 0        | 0.694      | 0.764 |
| OVA9                       | PRP8A     | 0            | 0             | 0        | 0.292         | 0.053       | 0        | 0.664      | 0.755 |
| AT3G03960                  | CPN60A    | 0            | 0             | 0        | 0.365         | 0.311       | 0.301    | 0.189      | 0.718 |
| EMB2761                    | OVA9      | 0.162        | 0             | 0        | 0.240         | 0.046       | 0        | 0.591      | 0.718 |
| SHD                        | SQN       | 0            | 0             | 0        | 0.112         | 0.182       | 0.257    | 0.539      | 0.717 |
| <i>Phytohormones</i>       |           |              |               |          |               |             |          |            |       |
| IBR1                       | PKT3      | 0.058        | 0             | 0        | 0.141         | 0.063       | 0.293    | 0.649      | 0.778 |
| ARFA1F                     | AT3G08530 | 0            | 0             | 0        | 0.042         | 0.167       | 0.494    | 0.477      | 0.760 |
| <i>Gene expression</i>     |           |              |               |          |               |             |          |            |       |
| AT1G57660                  | AT3G60245 | 0.190        | 0.202         | 0        | 0.934         | 0.853       | 0.656    | 0.546      | 0.998 |
| AT1G09640                  | HOG1      | 0            | 0             | 0        | 0.923         | 0           | 0        | 0.218      | 0.937 |
| AT1G09640                  | UAP56a    | 0            | 0             | 0        | 0.915         | 0.225       | 0        | 0.148      | 0.939 |
| AT1G09640                  | AT3G60245 | 0            | 0             | 0        | 0.914         | 0           | 0        | 0          | 0.914 |

|           |           |   |       |       |       |       |       |       |       |
|-----------|-----------|---|-------|-------|-------|-------|-------|-------|-------|
| RIN1      | UAP56a    | 0 | 0     | 0     | 0.910 | 0.094 | 0     | 0.055 | 0.916 |
| AT1G09640 | AT1G57660 | 0 | 0     | 0     | 0.903 | 0.676 | 0     | 0     | 0.967 |
| AT1G09640 | AT2G40290 | 0 | 0     | 0     | 0.855 | 0.047 | 0     | 0.599 | 0.939 |
| AT1G09640 | EIF4A1    | 0 | 0     | 0     | 0.843 | 0.225 | 0     | 0.636 | 0.952 |
| AT5G08650 | SCO1      | 0 | 0.407 | 0.572 | 0.841 | 0     | 0.308 | 0.511 | 0.924 |
| HTA9      | UAP56a    | 0 | 0     | 0     | 0.839 | 0.060 | 0.156 | 0.257 | 0.892 |
| AT1G09640 | SCO1      | 0 | 0     | 0     | 0.792 | 0.750 | 0     | 0.545 | 0.974 |
| AT1G57660 | AT2G40290 | 0 | 0     | 0     | 0.785 | 0     | 0     | 0.330 | 0.850 |
| AT2G40290 | EIF4A1    | 0 | 0     | 0     | 0.736 | 0.554 | 0.541 | 0.546 | 0.972 |
| AT1G09200 | HTB1      | 0 | 0     | 0     | 0.463 | 0.379 | 0.389 | 0.380 | 0.856 |
| HTB1      | T11P11.4  | 0 | 0     | 0     | 0.263 | 0.491 | 0.391 | 0.372 | 0.837 |
| AT1G09640 | RIN1      | 0 | 0     | 0     | 0.240 | 0.142 | 0     | 0.607 | 0.721 |
| HTA9      | HTB1      | 0 | 0     | 0     | 0.230 | 0.646 | 0.451 | 0.354 | 0.890 |
| AT1G09200 | T11P11.4  | 0 | 0     | 0     | 0.199 | 0.435 | 0.284 | 0.804 | 0.928 |
| HTA9      | T11P11.4  | 0 | 0     | 0     | 0.133 | 0.677 | 0.452 | 0.627 | 0.935 |
| AT1G09200 | HTA9      | 0 | 0     | 0     | 0.128 | 0.524 | 0.448 | 0.516 | 0.874 |
| HTA9      | RIN1      | 0 | 0     | 0     | 0.125 | 0.873 | 0.644 | 0.712 | 0.987 |
| AT2G40290 | AT2G42520 | 0 | 0     | 0     | 0.108 | 0.226 | 0.374 | 0.875 | 0.939 |
| AT1G09640 | HTA9      | 0 | 0     | 0     | 0.099 | 0     | 0     | 0.712 | 0.729 |
| HTB1      | RIN1      | 0 | 0     | 0     | 0.045 | 0.753 | 0.437 | 0.076 | 0.860 |
| AT1G09200 | RIN1      | 0 | 0     | 0     | 0     | 0.677 | 0.462 | 0.157 | 0.840 |
| RIN1      | T11P11.4  | 0 | 0     | 0     | 0     | 0.764 | 0.254 | 0.106 | 0.828 |

*Abiotic stress*

|           |          |       |   |   |       |       |       |       |       |
|-----------|----------|-------|---|---|-------|-------|-------|-------|-------|
| AOR       | PRXQ     | 0.102 | 0 | 0 | 0.941 | 0     | 0     | 0     | 0.944 |
| AT3G60750 | TRA2     | 0.190 | 0 | 0 | 0.774 | 0.720 | 0.966 | 0.710 | 0.999 |
| CSD1      | MSD1     | 0     | 0 | 0 | 0.116 | 0.722 | 0.902 | 0.928 | 0.998 |
| Hsp70-15  | Hsp81.4  | 0     | 0 | 0 | 0.794 | 0.620 | 0.380 | 0.662 | 0.981 |
| CAT       | CSD1     | 0.172 | 0 | 0 | 0.126 | 0.445 | 0.685 | 0.847 | 0.977 |
| ELF5A-3   | RPL10B   | 0     | 0 | 0 | 0.902 | 0.762 | 0     | 0.078 | 0.976 |
| CAT       | GOX1     | 0     | 0 | 0 | 0.213 | 0     | 0.923 | 0.575 | 0.972 |
| CR88      | Hsp70-15 | 0     | 0 | 0 | 0.520 | 0.620 | 0.380 | 0.765 | 0.969 |
| AT3G29320 | SEX1     | 0.190 | 0 | 0 | 0.863 | 0     | 0     | 0.732 | 0.967 |
| At5g06290 | TRX-M4   | 0.058 | 0 | 0 | 0.339 | 0.219 | 0.638 | 0.805 | 0.959 |
| PRXQ      | TRX-M4   | 0     | 0 | 0 | 0.684 | 0     | 0.501 | 0.741 | 0.955 |

|           |           |       |       |       |       |       |       |       |       |
|-----------|-----------|-------|-------|-------|-------|-------|-------|-------|-------|
| At5g06290 | CAT       | 0.067 | 0     | 0     | 0.601 | 0.520 | 0     | 0.770 | 0.953 |
| Hsp81.4   | MTHSC70-2 | 0     | 0     | 0     | 0.575 | 0.220 | 0.380 | 0.778 | 0.948 |
| HSP91     | Hsp81.4   | 0     | 0     | 0     | 0.462 | 0.620 | 0.380 | 0.641 | 0.948 |
| CR88      | HSP91     | 0     | 0     | 0     | 0.423 | 0.620 | 0.380 | 0.641 | 0.944 |
| Hsp70-15  | MTHSC70-2 | 0     | 0.412 | 0.713 | 0.821 | 0.184 | 0.480 | 0.672 | 0.940 |
| CAT       | MSD1      | 0.057 | 0     | 0     | 0.047 | 0.182 | 0.584 | 0.804 | 0.929 |
| At5g06290 | PRXQ      | 0.190 | 0.295 | 0.743 | 0.856 | 0.182 | 0     | 0.972 | 0.927 |
| MTHSC70-2 | ROF1      | 0     | 0     | 0     | 0.828 | 0.149 | 0.251 | 0.405 | 0.926 |
| CAT       | GPX7      | 0     | 0     | 0     | 0.205 | 0.439 | 0     | 0.840 | 0.922 |
| GSTF10    | GSTU19    | 0     | 0     | 0     | 0     | 0.045 | 0.263 | 0.894 | 0.919 |
| GSTF9     | GSTU19    | 0     | 0     | 0     | 0.074 | 0.045 | 0.263 | 0.870 | 0.903 |
| CPN10     | CR88      | 0     | 0     | 0     | 0.586 | 0.184 | 0     | 0.699 | 0.889 |
| AT1G53540 | HSP17.6II | 0     | 0.448 | 0.849 | 0.863 | 0     | 0     | 0.870 | 0.888 |
| AT3G52990 | AT3G60750 | 0.110 | 0     | 0     | 0.141 | 0.048 | 0.600 | 0.668 | 0.885 |
| CR88      | MTHSC70-2 | 0     | 0     | 0     | 0.388 | 0.220 | 0.380 | 0.652 | 0.883 |
| CAT       | TRA2      | 0     | 0     | 0     | 0.752 | 0.357 | 0     | 0.325 | 0.882 |
| AT3G60750 | AT5G63680 | 0.110 | 0     | 0     | 0.130 | 0.048 | 0.600 | 0.663 | 0.882 |
| DHAR3     | GPX7      | 0     | 0     | 0     | 0.073 | 0     | 0.650 | 0.643 | 0.874 |
| At5g06290 | GPX7      | 0     | 0     | 0     | 0.043 | 0.258 | 0     | 0.827 | 0.867 |
| AT2G22360 | MTHSC70-2 | 0.042 | 0.434 | 0     | 0.195 | 0.480 | 0.254 | 0.310 | 0.856 |
| ALDH5F1   | AT5G14590 | 0.065 | 0     | 0     | 0.043 | 0     | 0.800 | 0.230 | 0.843 |
| CSD1      | NDPK1     | 0     | 0     | 0     | 0.114 | 0.659 | 0     | 0.511 | 0.839 |
| ALDH5F1   | cICDH     | 0.065 | 0     | 0     | 0.043 | 0     | 0.800 | 0.175 | 0.832 |
| PRXQ      | SHM1      | 0.071 | 0     | 0     | 0.826 | 0     | 0     | 0     | 0.831 |
| At5g06290 | DHAR3     | 0     | 0     | 0     | 0.430 | 0     | 0     | 0.715 | 0.831 |
| CPN10     | HSP91     | 0.088 | 0     | 0     | 0.221 | 0.184 | 0     | 0.740 | 0.829 |
| RSR4      | TRA2      | 0.184 | 0     | 0     | 0     | 0     | 0.800 | 0     | 0.829 |
| MST1      | OASA1     | 0.185 | 0     | 0     | 0.061 | 0     | 0.600 | 0.498 | 0.826 |
| HSP91     | MTHSC70-2 | 0     | 0.412 | 0.709 | 0.472 | 0.184 | 0.480 | 0.662 | 0.824 |
| CLPB3     | CR88      | 0.073 | 0     | 0     | 0.283 | 0.069 | 0     | 0.744 | 0.821 |
| DHAR3     | GSTU19    | 0     | 0.405 | 0     | 0     | 0     | 0.650 | 0.192 | 0.817 |
| AT2G22360 | CR88      | 0     | 0     | 0     | 0.274 | 0.152 | 0.251 | 0.646 | 0.815 |
| NDPK1     | NDPK2     | 0     | 0.449 | 0.949 | 0.057 | 0     | 0.800 | 0.847 | 0.815 |
| CAT       | NDPK1     | 0     | 0     | 0     | 0     | 0.598 | 0     | 0.540 | 0.807 |
| AT5G14590 | cICDH     | 0     | 0.449 | 0.979 | 0     | 0     | 0.800 | 0.810 | 0.805 |

|           |           |       |       |       |       |       |       |       |       |
|-----------|-----------|-------|-------|-------|-------|-------|-------|-------|-------|
| GPX7      | PRXQ      | 0.062 | 0     | 0     | 0     | 0     | 0     | 0.800 | 0.805 |
| CLPB3     | MTHSC70-2 | 0.058 | 0     | 0     | 0.474 | 0.183 | 0     | 0.569 | 0.802 |
| AT3G60750 | RSR4      | 0     | 0     | 0     | 0.050 | 0     | 0.800 | 0     | 0.801 |
| CPN10     | MTHSC70-2 | 0.088 | 0     | 0     | 0.339 | 0.278 | 0     | 0.595 | 0.800 |
| AT5G63680 | TRA2      | 0.178 | 0     | 0     | 0.167 | 0     | 0.600 | 0.330 | 0.792 |
| AT2G22360 | Hsp70-15  | 0.042 | 0.362 | 0     | 0.189 | 0.303 | 0.254 | 0.343 | 0.791 |
| NDPK1     | TRA2      | 0     | 0     | 0     | 0.053 | 0.759 | 0     | 0.141 | 0.786 |
| NDPK2     | TRA2      | 0     | 0     | 0     | 0.053 | 0.759 | 0     | 0.141 | 0.786 |
| GOX1      | SHM1      | 0.175 | 0     | 0     | 0.461 | 0     | 0     | 0.552 | 0.783 |
| CAT       | cICDH     | 0     | 0     | 0     | 0.082 | 0.080 | 0.649 | 0.353 | 0.782 |
| AT1G53540 | HSP21     | 0     | 0.444 | 0.763 | 0.709 | 0     | 0     | 0.708 | 0.781 |
| AT2G22360 | HSP91     | 0.042 | 0.363 | 0     | 0.134 | 0.303 | 0.254 | 0.343 | 0.777 |
| AT5G14590 | MSD1      | 0.071 | 0     | 0     | 0.071 | 0.094 | 0.625 | 0.330 | 0.767 |
| AT3G52990 | TRA2      | 0.178 | 0     | 0     | 0.066 | 0     | 0.600 | 0.330 | 0.766 |
| CPN10     | Hsp81.4   | 0     | 0     | 0     | 0.557 | 0.184 | 0     | 0.402 | 0.765 |
| Hsp81.4   | ROF1      | 0     | 0     | 0     | 0.477 | 0.182 | 0.459 | 0.106 | 0.765 |
| CSD1      | NDPK2     | 0     | 0     | 0     | 0.114 | 0.659 | 0     | 0.282 | 0.764 |
| MSD1      | cICDH     | 0.071 | 0     | 0     | 0.054 | 0.094 | 0.625 | 0.330 | 0.763 |
| GPX7      | GSTF9     | 0     | 0     | 0     | 0.053 | 0     | 0.650 | 0.332 | 0.759 |
| CPN10     | Hsp70-15  | 0.088 | 0     | 0     | 0.249 | 0.184 | 0     | 0.610 | 0.753 |
| At5g06290 | CSD1      | 0     | 0     | 0     | 0.231 | 0.233 | 0     | 0.615 | 0.753 |
| AT5G14590 | CAT       | 0     | 0     | 0     | 0.082 | 0.080 | 0.649 | 0.262 | 0.752 |
| CSD1      | TRA2      | 0     | 0     | 0     | 0.170 | 0.702 | 0     | 0.060 | 0.747 |
| CAT       | NDPK2     | 0     | 0     | 0     | 0     | 0.229 | 0     | 0.672 | 0.736 |
| AOR       | DHAR3     | 0     | 0     | 0     | 0.733 | 0     | 0     | 0     | 0.733 |
| NDPK2     | PMSR4     | 0.048 | 0     | 0     | 0.110 | 0.522 | 0.309 | 0.188 | 0.731 |
| GPX7      | GSTF10    | 0     | 0     | 0     | 0.053 | 0     | 0.650 | 0.249 | 0.729 |
| Hsp70-15  | ROF1      | 0     | 0     | 0     | 0.556 | 0.147 | 0.251 | 0.156 | 0.728 |
| AT5G14590 | GOX1      | 0     | 0     | 0     | 0.048 | 0     | 0.603 | 0.319 | 0.720 |
| GOX1      | cICDH     | 0     | 0     | 0     | 0.048 | 0     | 0.603 | 0.319 | 0.720 |
| CAT       | PRXQ      | 0     | 0     | 0     | 0.046 | 0     | 0     | 0.718 | 0.719 |
| DHAR3     | GSTF9     | 0     | 0     | 0     | 0     | 0     | 0.650 | 0.230 | 0.719 |
| CSD1      | GPX7      | 0.057 | 0     | 0     | 0.105 | 0.185 | 0.332 | 0.481 | 0.718 |
| GPX7      | MSD1      | 0     | 0     | 0     | 0     | 0.256 | 0.371 | 0.433 | 0.711 |
| NDPK1     | PMSR4     | 0.048 | 0     | 0     | 0     | 0.522 | 0.309 | 0.188 | 0.710 |

|       |         |       |   |   |       |       |   |       |       |
|-------|---------|-------|---|---|-------|-------|---|-------|-------|
| CLPB3 | Hsp81.4 | 0.073 | 0 | 0 | 0.263 | 0.069 | 0 | 0.592 | 0.706 |
| CLPB3 | CPN10   | 0.071 | 0 | 0 | 0.164 | 0     | 0 | 0.651 | 0.706 |
| PMSR4 | PRXQ    | 0.190 | 0 | 0 | 0.206 | 0     | 0 | 0.578 | 0.705 |
